# Supplementary material
Source: publisher figshare collection journal article supplement (https://tandf.figshare.com/ndownloader/files/12404510)

## Supplementary Information

Appendix A: List of articles included in this review sorted in chronological order.

|     | Authors                                                                                              | Year | Title                                                                                                                                                 | Source Title                                       |
|-----|------------------------------------------------------------------------------------------------------|------|-------------------------------------------------------------------------------------------------------------------------------------------------------|----------------------------------------------------|
| 1.  | Moraga CA, Funes MC, Pizarro JC, Briceño C, Novaro AJ                                                | 2015 | Effects of livestock on guanaco Lama guanicoe density, movements and habitat selection in a forest-grassland mosaic in Tierra del Fuego, Chile        | Oryx                                               |
| 2.  | Babinard J, Bennett CR, Hatzioios ME, Faiz A, Somani A                                               | 2014 | Sustainably managing natural resources and the need for construction materials in Pacific island countries: The example of South Tarawa, Kiribati     | Natural Resources Forum                            |
| 3.  | Ballantine, B                                                                                        | 2014 | Fifty years on: Lessons from marine reserves in New Zealand and principles for a worldwide network                                                    | Biological Conservation                            |
| 4.  | Boys KA, Willis DB, Carpio CE.                                                                       | 2014 | Consumer willingness to pay for organic and locally grown produce on Dominica: insights into the potential for an "Organic Island"                    | Environment development and sustainability         |
| 5.  | Brunnschweiler JM, Abrantes KG, Barnett A                                                            | 2014 | Long-Term Changes in Species Composition and Relative Abundances of Sharks at a Provisioning Site                                                     | Plos One                                           |
| 6.  | Butler JR, Skewes T, Mitchell D, Pontio M, Hills T.                                                  | 2014 | Stakeholder perceptions of ecosystem service declines in Milne Bay, Papua New Guinea: Is human population a more critical driver than climate change? | Marine Policy                                      |
| 7.  | Canavan, B                                                                                           | 2014 | Sustainable tourism: development, decline and de-growth. Management issues from the Isle of Man                                                       | Journal of Sustainable Tourism                     |
| 8.  | Cerda C, Barkmann J, Marggraf R                                                                      | 2014 | Non-market economic valuation of the benefits provided by temperate ecosystems at the extreme south of the Americas                                   | Regional Environmental Change                      |
| 9.  | Cleasby N, Schwarz AM, Phillips M, Paul C, Pant J, Oeta J, Pickering T, Meloty A, Laumani M, Kori M. | 2014 | The socio-economic context for improving food security through land based aquaculture in Solomon Islands: A peri-urban case study                     | Marine Policy                                      |
| 10. | Evangelou E, Dalias P, Giourga C, Tsadilas C.                                                        | 2014 | Effect of Land-Use History on Soil Carbon and Nitrogen in a Mediterranean Catchment                                                                   | Communication s in soil science and plant analysis |
| 11. | Fenner, D                                                                                            | 2014 | Fishing down the largest coral reef fish species                                                                                                      | Marine Pollution Bulletin                          |

|     |                                                                   |      |                                                                                                                                                            |                                                          |
|-----|-------------------------------------------------------------------|------|------------------------------------------------------------------------------------------------------------------------------------------------------------|----------------------------------------------------------|
| 12. | Groom SV, Ngo HT, Rehan SM, Skelton P, Stevens MI, Schwarz MP     | 2014 | Multiple recent introductions of apid bees into Pacific archipelagos signify potentially large consequences for both agriculture and indigenous ecosystems | Biological Invasions                                     |
| 13. | Hall A, Day M.                                                    | 2014 | Ecotourism in the state forest karst of Puerto Rico                                                                                                        | Journal of cave and karst studies                        |
| 14. | Hossain MS, Sarker S, Chowdhury SR, Sharifuzzaman SM              | 2014 | Discovering spawning ground of Hilsa shad (Tenuulosa ilisha) in the coastal waters of Bangladesh                                                           | Ecological Modelling                                     |
| 15. | Hughes RF, Asner GP, Mascaro J, Uowolo A, Baldwin J               | 2014 | Carbon storage landscapes of lowland Hawaii: the role of native and invasive species through space and time                                                | Ecological Applications                                  |
| 16. | Hunter EA, Gibbs JP.                                              | 2014 | Densities of Ecological Replacement Herbivores Required to Restore Plant Communities: A Case Study of Giant Tortoises on Pinta Island, Galapagos           | Restoration Ecology                                      |
| 17. | Luksenburg JA, Parsons EC                                         | 2014 | Attitudes towards marine mammal conservation issues before the introduction of whale-watching: a case study in Aruba (southern Caribbean)                  | Aquatic Coneservation – Marine and Freshwater Ecosystems |
| 18. | Moscardo G, Murphy L                                              | 2014 | There Is No Such Thing as Sustainable Tourism: Re-Conceptualizing Tourism as a Tool for Sustainability                                                     | Sustainability                                           |
| 19. | Nahuelhual L, Carmona A, Aguayo M, Echeverria C                   | 2014 | Land use change and ecosystem services provision: a case study of recreation and ecotourism opportunities in southern Chile                                | Landscape Ecology                                        |
| 20. | Pocock, C.                                                        | 2014 | Aborigines, Islanders and Hula Girls in Great Barrier Reef Tourism                                                                                         | The Journal of Pacific History                           |
| 21. | Queiroz RE, Guerreiro J, Ventura MA.                              | 2014 | Demand of the tourists visiting protected areas in small oceanic islands: the Azores case-study (Portugal)                                                 | Environment Development and Sustainability               |
| 22. | Rader R, Bartomeus I, Tylianakis JM, Laliberté E.                 | 2014 | The winners and losers of land use intensification: pollinator community disassembly is non-random and alters functional diversity                         | Diversity and Distributins                               |
| 23. | Raposeiro PM, Martins GM, Moniz I, Cunha A, Costa AC, Goncalves V | 2014 | Leaf litter decomposition in remote oceanic islands: The role of macroinvertebrates vs. microbial decomposition of native vs. exotic plant species         | Limnologica - Ecology and Management of Inland Waters    |
| 24. | Rengarajan S, Veeraragavan S, Thangaraj M, Ramachandran R.        | 2014 | Geographical analysis of tourism sites in Andaman Archipelago (India) and ecotourismdevelopment for Smith Island of North Andaman                          | International Journal of Sustainable                     |

|     |                                                               |      |                                                                                                                                                           |                                         |
|-----|---------------------------------------------------------------|------|-----------------------------------------------------------------------------------------------------------------------------------------------------------|-----------------------------------------|
|     |                                                               |      |                                                                                                                                                           | Development & World Ecology             |
| 25. | Rocha F, da Silva EF. Geotourism                              | 2014 | Geotourism, Medical Geology and local development: Cape Verde case study                                                                                  | Journal of African Earth Sciences       |
| 26. | Ruifrok JL, Postma F, Olff H, Smit C.                         | 2014 | Scale-dependent effects of grazing and topographic heterogeneity on plant species richness in a Dutch salt marsh ecosystem                                | Applied Vegetation Science              |
| 27. | Scanlon AT, Petit S, Tuiwawa M, Naikatini A                   | 2014 | High similarity between a bat-serviced plant assemblage and that used by humans                                                                           | Biological Conservation                 |
| 28. | Setegn SG, Melesse AM, Haiduk A, Webber D, Wang X, McClain ME | 2014 | Modeling hydrological variability of fresh water resources in the Rio Cobre watershed, Jamaica                                                            | Catena                                  |
| 29. | Singh S, Singh DR, Kumar K, Birah A                           | 2014 | Eco-friendly management modules for bacterial wilt ( <i>Ralstonia solanacearum</i> ) of tomato for protected cultivation in a tropical island ecosystem   | Biological Agriculture & Horticulture   |
| 30. | Stephenson J, Berkes F, Turner N, Dick J.                     | 2014 | Biocultural conservation of marine ecosystems: Examples from New Zealand and Canada                                                                       | Indian journal of traditional knowledge |
| 31. | Van Riper CJ, Kyle GT.                                        | 2014 | Capturing multiple values of ecosystem services shaped by environmental worldviews: A spatial analysis                                                    | Journal of Environmental Management     |
| 32. | Walter RK, Hamilton RJ                                        | 2014 | A cultural landscape approach to community-based conservation in Solomon Islands                                                                          | Ecology and Society                     |
| 33. | Whitehead AL, Byrom AE, Clayton RI, Pech RP                   | 2014 | Removal of livestock alters native plant and invasive mammal communities in a dry grassland-shrubland ecosystem                                           | Biological Invasions                    |
| 34. | Woodward C, Shulmeister J, Zawadzki A, Jacobsen G.            | 2014 | Major disturbance to aquatic ecosystems in the South Island, New Zealand, following human settlement in the Late Holocene                                 | The Holocene                            |
| 35. | Abecasis RC, Schmidt L, Longnecker N, Clifton J.              | 2013 | Implications of community and stakeholder perceptions of the marine environment and its conservation for MPA management in a small Azorean island         | Ocean & Coastal Management              |
| 36. | Aretano R, Petrosillo I, Zaccarelli N, Semeraro T, Zurlini G  | 2013 | People perception of landscape change effects on ecosystem services in small Mediterranean islands: A combination of subjective and objective assessments | Landscape and Urban Planning            |

|     |                                                                                                           |      |                                                                                                                                                                                                        |                                           |
|-----|-----------------------------------------------------------------------------------------------------------|------|--------------------------------------------------------------------------------------------------------------------------------------------------------------------------------------------------------|-------------------------------------------|
| 37. | Bruce BD, Bradford RW.                                                                                    | 2013 | The effects of shark cage-diving operations on the behaviour and movements of white sharks, <i>Carcharodon carcharias</i> , at the Neptune Islands, South Australia                                    | Marine Biology                            |
| 38. | Cheng TM, C. Wu H, Huang LM.                                                                              | 2013 | Send More Tourists! Stakeholder Perceptions of a Tourism Industry in Late Stage Decline: the Case of the Isle of Man                                                                                   | International Journal of Tourism Research |
| 39. | Cheng TM, C. Wu H, Huang LM.                                                                              | 2013 | The influence of place attachment on the relationship between destination attractiveness and environmentally responsible behavior for island tourism in Penghu, Taiwan                                 | Journal of sustainable tourism            |
| 40. | Corcoran MJ, Wetherbee BM, Shivji MS, Potenski MD, Chapman DD, Harvey GM.                                 | 2013 | Supplemental Feeding for Ecotourism Reverses Diel Activity and Alters Movement Patterns and Spatial Distribution of the Southern Stingray, <i>Dasyatis americana</i>                                   | Plos One                                  |
| 41. | Dashti S, Monavari SM, Hosseini SM, Riazzi B, Momeni M.                                                   | 2013 | Application of GIS, AHP, Fuzzy and WLC in Island Ecotourism Development (Case study of Qeshm Island, Iran)                                                                                             | Life Science Journal                      |
| 42. | Glen AS, Atkinson R, Campbell KJ, Hagen E, Holmes ND, Keitt BS, Parkes JP, Saunders A, Sawyer J, Torres H | 2013 | Eradicating multiple invasive species on inhabited islands: the next big step in island restoration?                                                                                                   | Biological Invasions                      |
| 43. | Hanna C, Foote D, Kremen C.                                                                               | 2013 | Invasive species management restores a plant-pollinator mutualism in Hawaii                                                                                                                            | Journal of Applied Ecology                |
| 44. | Hassanali K                                                                                               | 2013 | Towards sustainable tourism: The need to integrate conservation and development using the Buccoo Reef Marine Park, Tobago, West Indies                                                                 | Natural Resources Forum                   |
| 45. | Havird JC, Weeks JR, Hau S, Santos SR.                                                                    | 2013 | Invasive fishes in the Hawaiian anchialine ecosystem: investigating potential predator avoidance by endemic organisms                                                                                  | Hydrobiologia                             |
| 46. | Holitzki TM, MacKenzie RA, Wiegner TN, McDermid KJ.                                                       | 2013 | Differences in ecological structure, function, and native species abundance between native and invaded Hawaiian streams                                                                                | Ecological Applications                   |
| 47. | Hoyman MM, McCall JR                                                                                      | 2013 | Is there trouble in paradise? The perspectives of Galapagos community leaders on managing economic development and environmental conservation through ecotourism policies and the Special Law of 1998. | Journal of Ecotourism                     |
| 48. | Huveneers C, Rogers PJ, Beckmann C, Semmens JM, Bruce BD, Seuront L                                       | 2013 | The effects of cage-diving activities on the fine-scale swimming behaviour and space use of white sharks                                                                                               | Marine Biology                            |

|     |                                                                                        |      |                                                                                                                                                                          |                                                 |
|-----|----------------------------------------------------------------------------------------|------|--------------------------------------------------------------------------------------------------------------------------------------------------------------------------|-------------------------------------------------|
| 49. | Korsten AC, Lee WG, Monks A, Wilson JB.                                                | 2013 | Understanding the role of birds in sustaining indigenous turf communities in a lacustrine wetland in New Zealand                                                         | New Zealand Journal of Ecology                  |
| 50. | Leopold M, Beckensteiner J, Kaltavara J, Raubani J, Caillon S.                         | 2013 | Community-based management of near-shore fisheries in Vanuatu: What works?                                                                                               | Marine Policy                                   |
| 51. | Linan EL, Ella VB, Florece LM                                                          | 2013 | GIS-Based Assessment of Groundwater Vulnerability to Contamination in Boracay Island Using DRASTIC Model                                                                 | Journal of environmental science and management |
| 52. | Lucas KL, Carter GA.                                                                   | 2013 | Change in distribution and composition of vegetated habitats on Horn Island, Mississippi, northern Gulf of Mexico, in the initial five years following Hurricane Katrina | Geomorphology                                   |
| 53. | Masterson JP, Fienen MN, Thieler ER, Gesch DB, Gutierrez BT, Plant NG.                 | 2013 | Effects of sea-level rise on barrier island groundwater system dynamics - ecohydrological implications                                                                   | Ecohydrology                                    |
| 54. | McCauley DJ, Power EA, Bird DW, McInturff A, Dunbar RB, Durham WH, Micheli F, Young HS | 2013 | Conservation at the edges of the world                                                                                                                                   | Biological Conservation                         |
| 55. | Michelutti N, McCleary KM, Antoniades D, Sutherland P, Blais JM, Douglas MS, Smol JP   | 2013 | Using paleolimnology to track the impacts of early Arctic peoples on freshwater ecosystems from southern Baffin Island, Nunavut                                          | Quaternary Science Reviews                      |
| 56. | Ortega JL, Dagostino RM, Massam BH                                                     | 2013 | Sustainable Tourism: Whale Watching Footprint in the Bahia de Banderas, Mexico                                                                                           | Journal of Coastal Research                     |
| 57. | Paolucci EM, MacIsaac HJ, Ricciardi A.                                                 | 2013 | Origin matters: alien consumers inflict greater damage on prey populations than do native consumers                                                                      | Diversity & Distributions                       |
| 58. | Pratt S                                                                                | 2013 | Minimising food miles: issues and outcomes in an ecotourism venture in Fiji                                                                                              | Journal of Sustainable Tourism                  |
| 59. | Ríos-Jara E, Galván-Villa CM, Rodríguez-Zaragoza FA, López-Uriarte E,                  | 2013 | The Tourism Carrying Capacity of Underwater Trails in Isabel Island National Park, Mexico                                                                                | Environmental Management                        |

|     |                                                                             |      |                                                                                                                                                                              |                                                                                 |
|-----|-----------------------------------------------------------------------------|------|------------------------------------------------------------------------------------------------------------------------------------------------------------------------------|---------------------------------------------------------------------------------|
|     | Muñoz-Fernández VT                                                          |      |                                                                                                                                                                              |                                                                                 |
| 60. | Rosciano NG, Svagelj WS, Rey AR.                                            | 2013 | Effect of anthropic activity on the Imperial Cormorants and Rock Shags colonies in the Beagle Channel, Tierra del Fuego                                                      | Revista de biología marina y oceanografía                                       |
| 61. | Ruiz-Ballesteros E, Brondizio E                                             | 2013 | Building Negotiated Agreement: The Emergence of Community-Based Tourism in Floreana (Galapagos Islands)                                                                      | Human Organization                                                              |
| 62. | Satake K, Ueno R.                                                           | 2013 | Distribution of freshwater macroinvertebrates in streams with dams and associated reservoirs on a subtropical oceanic island off southern Japan                              | Limnology                                                                       |
| 63. | Sokos CK, Mamolos AP, Kalburtji KL, Birtsas PK                              | 2013 | Farming and wildlife in Mediterranean agroecosystems                                                                                                                         | Journal for Nature Conservation                                                 |
| 64. | Steven R, Castley JG                                                        | 2013 | Tourism as a threat to critically endangered and endangered birds: global patterns and trends in conservation hotspots                                                       | Biodiversity & Conservation                                                     |
| 65. | Tscheulin T, Petanidou T                                                    | 2013 | The presence of the invasive plant <i>Solanum elaeagnifolium</i> deters honeybees and increases pollen limitation in the native co-flowering species <i>Glaucium flavum</i>  | Biological Invasions                                                            |
| 66. | Butler JR, Tawake A, Skewes T, Tawake L, McGrath V                          | 2012 | Integrating Traditional Ecological Knowledge and Fisheries Management in the Torres Strait, Australia: the Catalytic Role of Turtles and Dugong as Cultural Keystone Species | Ecology and Society                                                             |
| 67. | Chamorro S, Heleno R, Olesen JM, McMullen CK, Traveset A                    | 2012 | Pollination patterns and plant breeding systems in the Galapagos: a review                                                                                                   | Annals of Botany                                                                |
| 68. | Dhaneesh KV, Gopi M, Ganeshamurthy R, Kumar TT, Balasubramanian T           | 2012 | Bio-accumulation of metals on reef associated organisms of Lakshadweep Archipelago                                                                                           | Food Chemistry                                                                  |
| 69. | Dymond JR, Ausseil AG, Ekanayake JC, Kirschbaum MU                          | 2012 | Tradeoffs between soil, water, and carbon - A national scale analysis from New Zealand                                                                                       | Journal of Environmental Management                                             |
| 70. | Goldstein JH, Caldarone G, Kaeo Duarte T, Ennaanay D, Hannahs N, Mendoza G, | 2012 | Integrating ecosystem-service tradeoffs into land-use decisions                                                                                                              | Proceedings of the National Academy of Sciences of the United States of America |

|     |                                                                                                          |      |                                                                                                                                                      |                                          |
|-----|----------------------------------------------------------------------------------------------------------|------|------------------------------------------------------------------------------------------------------------------------------------------------------|------------------------------------------|
|     | Polasky S,<br>Wolny S, Daily GC.                                                                         |      |                                                                                                                                                      |                                          |
| 71. | Gössling S, Hansson CB, Hörstmeier O, Saggel S                                                           | 2012 | Ecological footprint analysis as a tool to assess tourism sustainability                                                                             | Ecological Economics                     |
| 72. | Greenwood MJ, Harding JS, Niyogi DK, McIntosh AR                                                         | 2012 | Improving the effectiveness of riparian management for aquatic invertebrates in a degraded agricultural landscape: stream size and land-use legacies | Journal of Applied Ecology               |
| 73. | Hakim L, Soemarno M, Hong SK                                                                             | 2012 | Challenges for conserving biodiversity and developing sustainable island tourism in North Sulawesi Province, Indonesia                               | Journal of Ecology and Field Biology     |
| 74. | Holomuzki JR, Biggs BJ                                                                                   | 2012 | Same enemy, same response: predator avoidance by an invasive and native snail                                                                        | New Zealand Natural Sciences             |
| 75. | Jaafar M, Maideen SA                                                                                     | 2012 | Ecotourism-related products and activities, and the economic sustainability of small and medium island chalets                                       | Tourism management                       |
| 76. | Jitpakdee R, Thapa GB                                                                                    | 2012 | Sustainability Analysis of Ecotourism on Yao Noi Island, Thailand                                                                                    | Asia Pacific Journal Of Tourism Research |
| 77. | Kafyri A, Hovardas T, Poirazidis K.                                                                      | 2012 | Determinants of visitor pro-environmental intentions on two small Greek islands: is ecotourism possible at coastal protected areas?                  | Environmental Management                 |
| 78. | Kenney LA, von Hippel FA, Willacker JJ, O'Hara TM                                                        | 2012 | Mercury concentrations of a resident freshwater forage fish at Adak Island, Aleutian Archipelago, Alaska                                             | Environmental toxicology and chemistry   |
| 79. | Kim JY, Mjelde JW, Kim TK, Lee CK, Ahn KM                                                                | 2012 | Comparing willingness-to-pay between residents and non-residents when correcting hypothetical bias: Case of endangered spotted seal in South Korea   | Ecological Economics                     |
| 80. | Klain SC, Chan KM.                                                                                       | 2012 | Navigating coastal values: Participatory mapping of ecosystem services for spatial planning                                                          | Ecological Economics                     |
| 81. | Ku'ulei SR, Kido MH, Jokiel PL, Edmonds T, Brown EK                                                      | 2012 | Use of integrated landscape indicators to evaluate the health of linked watersheds and coral reef environments in the Hawaiian islands               | Environmental Management                 |
| 82. | La Mantia T, Messana G, Billeci V, Dimarca A, Del Signore M, Leanza M, Livreri Console S, Maraventano G, | 2012 | Combining bioengineering and plant conservation on a Mediterranean islet                                                                             | iForest                                  |

|     |                                                                                                                                      |      |                                                                                                                                                                |                                        |
|-----|--------------------------------------------------------------------------------------------------------------------------------------|------|----------------------------------------------------------------------------------------------------------------------------------------------------------------|----------------------------------------|
|     | Nicolini G, Prazzi E, Quatrini P.                                                                                                    |      |                                                                                                                                                                |                                        |
| 83. | Leue M, Lang F.                                                                                                                      | 2012 | Recycling soil nutrients by using channel deposits as fertilizers?                                                                                             | Nutrient Cycling in Agroecosystems     |
| 84. | Lorden R, Sambrook R, Mitchell RW                                                                                                    | 2012 | Residents' and Tourists' Knowledge of Sea Lions in the Galapagos                                                                                               | Society & Animals                      |
| 85. | Mora JL, Armas-Herrera CM, Guerra JA, Rodríguez-Rodríguez A, Arbelo CD.                                                              | 2012 | Factors affecting vegetation and soil recovery in the Mediterranean woodland of the Canary Islands (Spain)                                                     | Journal of Arid Environments           |
| 86. | Moslemi JM, Snider SB, MacNeill K, Gilliam JF, Flecker AS                                                                            | 2012 | Impacts of an invasive snail ( <i>Tarebia granifera</i> ) on nutrient cycling in tropical streams: the role of riparian deforestation in Trinidad, West Indies | Plos One                               |
| 87. | Nagata M, Miyakoshi Y, Urabe H, Fujiwara M, Sasaki Y, Kasugai K, Torao M, Ando D, Kaeriyama M                                        | 2012 | An overview of salmon enhancement and the need to manage and monitor natural spawning in Hokkaido, Japan                                                       | Environmental Biology of Fishes        |
| 88. | Oost AP, Hoekstra P, Wiersma A, Flemming B, Lammerts EJ, Pejrup M, Hofstede J, Van der Valk B, Kiden P, Bartholdy J, Van der Berg MW | 2012 | Barrier island management: Lessons from the past and directions for the future                                                                                 | Ocean & Coastal Management             |
| 89. | Perkins KS, Nimmo JR, Medeiros AC                                                                                                    | 2012 | Effects of native forest restoration on soil hydraulic properties, Auwahi, Maui, Hawaiian Islands                                                              | Geophysical Research Letters           |
| 90. | Ramírez A, Engman A, Rosas KG, Perez-Reyes O, Martínó-Cardona DM                                                                     | 2012 | Urban impacts on tropical island streams: Some key aspects influencing ecosystem response                                                                      | Urban Ecosystems                       |
| 91. | Ramos-Scharrón CE                                                                                                                    | 2012 | Effectiveness of drainage improvements in reducing sediment production rates from an unpaved road                                                              | Journal of Soil and water conservation |
| 92. | Ressurreição A, Gibbons J, Kaiser M, Dentine TP, Zarzycki T, Bentley C, Austen M,                                                    | 2012 | Different cultures, different values: The role of cultural variation in public's WTP for marine species conservation                                           | Biological Conservation                |



|      |                                                                                          |      |                                                                                                                                              |                                                 |
|------|------------------------------------------------------------------------------------------|------|----------------------------------------------------------------------------------------------------------------------------------------------|-------------------------------------------------|
|      | Burdon D, Atkins J, Santos RS, Edwards-Jones G                                           |      |                                                                                                                                              |                                                 |
| 93.  | Ressurreição A, Zarzycki T, Kaiser M, Edwards-Jones G, Dentinho TP, Santos RS, Gibbons J | 2012 | Towards an ecosystem approach for understanding public values concerning marine biodiversity loss                                            | Marine Ecology Progress Series                  |
| 94.  | Shahbudin S, Zuhairi A, Kamaruzzaman BY                                                  | 2012 | Impact of coastal development on mangrove cover in Kilim river, Langkawi Island, Malaysia                                                    | Journal of Forestry Research                    |
| 95.  | Spanou S, Tseggenidi K, Georgiadis T.                                                    | 2012 | Perception of Visitors' Environmental Impacts of Ecotourism: A case study in the Valley of Butterflies protected area, Rhodes Island, Greece | International Journal of Environmental Research |
| 96.  | Vaccari FP, Lugato E, Gioli B, D'Acqui L, Genesio L, Toscano P, Matese A, Miglietta F.   | 2012 | Land use change and soil organic carbon dynamics in Mediterranean agro-ecosystems: The case study of Pianosa Island                          | Geoderma                                        |
| 97.  | van Riper CJ, Kyle GT, Sutton SG, Barnes M, Sherrouse BC                                 | 2012 | Mapping outdoor recreationists' perceived social values for ecosystem services at Hinchinbrook Island National Park, Australia               | Applied Geography                               |
| 98.  | Zaimes GN, Emmanouloudis D, Iakovoglou V                                                 | 2012 | Estimating soil erosion in Natura 2000 areas located on three semi-arid Mediterranean islands                                                | Journal of Environmental Biology                |
| 99.  | Albores-Barajas YV, Soldatini C.                                                         | 2011 | Effects of human disturbance on a burrow nesting seabird                                                                                     | Revista Mexicana de Biodiversidad               |
| 100. | Arevalo JR, Delgado JD, Fernandez-Palacios JM                                            | 2011 | Regeneration of potential laurel forest under a native canopy and an exotic canopy, Tenerife (Canary Islands)                                | Forest Systems                                  |
| 101. | Burns GL, MacBeth J, Moore S.                                                            | 2011 | Should dingoes die? Principles for engaging ecocentric ethics in wildlife tourism management.                                                | Journal of ecotourism                           |
| 102. | Chamas CC, Schmidt A.                                                                    | 2011 | Ecotourism and Heritage Conservation                                                                                                         | Journal of Coastal research                     |
| 103. | Chernela JM                                                                              | 2011 | Barriers Natural and Unnatural: Islamiento as a Central Metaphor in Kuna Ecotourism                                                          | Bulletin of Latin American Research             |
| 104. | Cruz A, Benedicto J, Gil A                                                               | 2011 | Socio-economic Benefits of Natura 2000 in Azores Islands – a Case Study approach on ecosystem services provided by a Special Protected Area  | Journal of Coastal Research                     |

|      |                                                                                                       |      |                                                                                                                                                    |                                                                  |
|------|-------------------------------------------------------------------------------------------------------|------|----------------------------------------------------------------------------------------------------------------------------------------------------|------------------------------------------------------------------|
| 105. | Dodd M, Barker G, Burns B, Didham R, Innes J, King C, Smale M, Watts C                                | 2011 | Resilience of New Zealand indigenous forest fragments to impacts of livestock and pest mammals                                                     | New Zealand Journal of Ecology                                   |
| 106. | Dunkell DO, Bruland GL, Evensen CI, Litton CM                                                         | 2011 | Runoff, Sediment Transport, and Effects of Feral Pig ( <i>Sus scrofa</i> ) Exclusion in a Forested Hawaiian Watershed                              | Pacific Science                                                  |
| 107. | Fernández-Lugo S, de Nascimento L, Mellado M, Arévalo JR                                              | 2011 | Grazing effects on species richness depends on scale: a 5-year study in Tenerife pastures (Canary Islands)                                         | Plant Ecology                                                    |
| 108. | Foggi B, Lastrucci L, Viciani D, Brunialti G, Benesperi R.                                            | 2011 | Long-term monitoring of an invasion process: the case of an isolated small wetland on a Mediterranean Island                                       | Biologia                                                         |
| 109. | Freedman B, Catling PM, Lucas Z.                                                                      | 2011 | Effects of Feral Horses on Vegetation of Sable Island, Nova Scotia                                                                                 | Canadian Field Naturalist                                        |
| 110. | Herbeck LS, Unger D, Krumme U, Liu SM, Jennerjahn TC                                                  | 2011 | Typhoon-induced precipitation impact on nutrient and suspended matter dynamics of a tropical estuary affected by human activities in Hainan, China | Estuarine, Coastal and Shelf Science                             |
| 111. | Higgins-Desbiolles F                                                                                  | 2011 | Death by a thousand cuts: governance and environmental trade-offs in ecotourism development at Kangaroo Island, South Australia                    | Journal of Sustainable Development                               |
| 112. | Hines KN                                                                                              | 2011 | Effects of ecotourism on endangered northern Bahamian Rock Iguanas ( <i>Cyclura cyclura</i> ).                                                     | Herpetological Conservation and Biology                          |
| 113. | Hong SK                                                                                               | 2011 | Biocultural diversity and traditional ecological knowledge in island regions of Southwestern Korea                                                 | Journal of Ecology and Environment                               |
| 114. | Huang B, Lubarsky K, Teng T, Blumstein DT                                                             | 2011 | Take only pictures, leave only ... fear? The effects of photography on the West Indian anole <i>Anolis cristatellus</i>                            | Current Zoology                                                  |
| 115. | Jaffal A, Givaudan N, Betoulle S, Terreau A, Paris-Palacios S, Biagianti-Risbourg S, Beall E, Roche H | 2011 | Polychlorinated biphenyls in freshwater salmonids from the Kerguelen Islands in the Southern Ocean                                                 | Environmental Pollution                                          |
| 116. | Kaffashi S, Yavari M                                                                                  | 2011 | Land-use planning of Minoo Island, Iran, towards sustainable land-use management                                                                   | International Journal of Sustainable Development & World Ecology |

|      |                                                                                                                                                  |      |                                                                                                                                            |                                              |
|------|--------------------------------------------------------------------------------------------------------------------------------------------------|------|--------------------------------------------------------------------------------------------------------------------------------------------|----------------------------------------------|
| 117. | Kenter JO, Hyde T, Christie M, Fazey I.                                                                                                          | 2011 | The importance of deliberation in valuing ecosystem services in developing countries—Evidence from the Solomon Islands                     | Global Environmental Change                  |
| 118. | Lagabrielle E, Rouget M, Le Bourgeois T, Payet K, Durieux L, Baret S, Dupont J, Strasberg D                                                      | 2011 | Integrating conservation, restoration and land-use planning in islands-An illustrative case study in Reunion Island (Western Indian Ocean) | Landscape and Urban Planning                 |
| 119. | Lee JH, Iwasa Y                                                                                                                                  | 2011 | Tourists and traditional divers in a common fishing ground                                                                                 | Ecological Economics                         |
| 120. | Moseman-Valtierra S, Gonzalez R, Kroeger KD, Tang J, Chao WC, Crusius J, Bratton J, Green A, Shelton J.                                          | 2011 | Short-term nitrogen additions can shift a coastal wetland from a sink to a source of N <sub>2</sub> O                                      | Atmospheric Environment                      |
| 121. | Nico LG, Walsh SJ                                                                                                                                | 2011 | Non-indigenous freshwater fishes on tropical Pacific islands: a review of eradication efforts.                                             | Island Invasives: Eradication and Management |
| 122. | Nielsen A, Steffan-Dewenter I, Westphal C, Messinger O, Potts SG, Roberts SP, Settele J, Szentgyörgyi H, Vaissiere BE, Vaitis M, Woyciechowski M | 2011 | Assessing bee species richness in two Mediterranean communities: importance of habitat type and sampling techniques                        | Ecological Research                          |
| 123. | Nikolaidis NP                                                                                                                                    | 2011 | Human impacts on soils: Tipping points and knowledge gaps                                                                                  | Applied Geochemistry                         |
| 124. | Oney B, Shapiro A, Wegmann M                                                                                                                     | 2011 | Evolution of water quality around the Island of Borneo during the last 8-years                                                             | Procedia Environmental Sciences              |
| 125. | Plagányi EE, Bell JD, Bustamante RH, Dambacher JM, Dennis DM, Dichmont CM, Dutra LX, Fulton EA, Hobday AJ, van Putten EI, Smith F                | 2011 | Modelling climate-change effects on Australian and Pacific aquatic ecosystems: a review of analytical tools and management implications    | Marine and Freshwater Research               |
| 126. | Plieninger T, Schaich H, Kizos T                                                                                                                 | 2011 | Land-use legacies in the forest structure of silvopastoral oak woodlands in the Eastern Mediterranean                                      | Regional Environmental Change                |

|      |                                                                           |      |                                                                                                                                                                                                       |                                                  |
|------|---------------------------------------------------------------------------|------|-------------------------------------------------------------------------------------------------------------------------------------------------------------------------------------------------------|--------------------------------------------------|
| 127. | Raposeiro PM,<br>Costa AC, Martins<br>AF                                  | 2011 | On the presence, distribution and habitat of the alien freshwater snail <i>Ferrissia fragilis</i> (Tryon, 1863) (Gastropoda: Planorbidae) in the oceanic islands of the Azores                        | Aquatic<br>Invasions                             |
| 128. | Simanonok MP,<br>Anderson CB,<br>Pastur GM,<br>Lencinas MV,<br>Kennedy JH | 2011 | A comparison of impacts from silviculture practices and North American beaver invasion on stream benthic macroinvertebrate community structure and function in Nothofagus forests of Tierra del Fuego | Forest Ecology<br>and<br>Management              |
| 129. | Vayssières J, Vigne<br>M, Alary V,<br>Lecomte P                           | 2011 | Integrated participatory modelling of actual farms to support policy making on sustainable intensification                                                                                            | Agricultural<br>Systems                          |
| 130. | Vougioukalou M,<br>Akriotis T,<br>Dimalexis A,                            | 2011 | Waterfowl habitat restoration in a seasonal island wetland                                                                                                                                            | Procedia<br>Environmental<br>Sciences            |
| 131. | Zananski TJ, Holsen<br>TM, Hopke PK,<br>Crimmins BS                       | 2011 | Mercury temporal trends in top predator fish of the Laurentian Great Lakes                                                                                                                            | Ecotoxicology                                    |
| 132. | Alik T, Velde BV,<br>Velde NV                                             | 2010 | Ruminant livestock on central Pacific atolls: the potential implications of soil on herbivorous animal survival and possible implications for agriculture and human health                            | Atoll Research<br>Bulletin                       |
| 133. | Berg OK, Finstad<br>AG, Olsen PH,<br>Arnekleiv JV,<br>Nilssen K.          | 2010 | Dwarfs and cannibals in the Arctic: production of Arctic char ( <i>Salvelinus alpinus</i> (L.)) at two trophic levels                                                                                 | Hydrobiologia                                    |
| 134. | Bulut I                                                                   | 2010 | Floating Islands of Turkey                                                                                                                                                                            | Procedia-Social<br>and Behavioral<br>Sciences    |
| 135. | Carter J                                                                  | 2010 | Displacing Indigenous Cultural Landscapes: the Naturalistic Gaze at Fraser Island World Heritage Area                                                                                                 | Geographical<br>research                         |
| 136. | Chiung-Hsin H,<br>Ching-Ta C, Shin-<br>Chang C.                           | 2010 | Marine and Island Ecotourism in the Pescadores Archipelago, Taiwan                                                                                                                                    | Journal of the<br>Fisheries Society<br>of Taiwan |
| 137. | Cidalia Tojiero M                                                         | 2010 | The Ecotourism Sustainable Strategy: Engagement and Overcoming                                                                                                                                        | Journal of<br>Coastal<br>Research                |
| 138. | Clua E, Buray N,<br>Legendre P,<br>Mourier J, Planes S                    | 2010 | Business partner or simple catch? The economic value of the sicklefin lemon shark in French Polynesia                                                                                                 | Marine and<br>Freshwater<br>Research             |
| 139. | Clua E, Buray N,<br>Legendre P,<br>Mourier J, Planes S                    | 2010 | Effects of provisioning on shark behaviour: Reply to Brunnschweiler & McKenzie (2010)                                                                                                                 | Marine Ecology<br>Progress Series                |

|      |                                                                                                           |      |                                                                                                                                                                     |                                                        |
|------|-----------------------------------------------------------------------------------------------------------|------|---------------------------------------------------------------------------------------------------------------------------------------------------------------------|--------------------------------------------------------|
| 140. | Clua E, Buray N, Legendre P, Mourier J, Planes S.                                                         | 2010 | Behavioural response of sicklefin lemon sharks <i>Negaprion acutidens</i> to underwater feeding for ecotourism purposes                                             | Marine Ecology Progress Series                         |
| 141. | Côté G, Pienitz R, Velle G, Wang X                                                                        | 2010 | Impact of Geese on the Limnology of Lakes and Ponds from Bylot Island (Nunavut, Canada)                                                                             | International Review of Hydrobiology                   |
| 142. | De los Ríos-Escalante P                                                                                   | 2010 | Freshwater ecosystems in oceanic islands of Chile: Conservation of endemic microfauna and the role of exotic species in the biological control of tropical diseases | Revista Chilena de Historia Natural                    |
| 143. | Fabinyi M                                                                                                 | 2010 | The Intensification of Fishing and the Rise of Tourism: Competing Coastal Livelihoods in the Calamianes Islands, Philippines                                        | Human Ecology                                          |
| 144. | Feagin RA, Smith WK, Psuty NP, Young DR, Martínez ML, Carter GA, Lucas KL, Gibeaut JC, Gemma JN, Koske RE | 2010 | Barrier Islands: Coupling Anthropogenic Stability with Ecological Sustainability                                                                                    | Journal of Coastal Research                            |
| 145. | French SS, DeNardo DF, Greives TJ, Strand CR, Demas GE                                                    | 2010 | Human disturbance alters endocrine and immune responses in the Galapagos marine iguana ( <i>Amblyrhynchus cristatus</i> )                                           | Hormones and behaviour                                 |
| 146. | Greaver TL, Sternberg LS                                                                                  | 2010 | Decreased precipitation exacerbates the effects of sea level on coastal dune ecosystems in open ocean islands                                                       | Global Change Biology                                  |
| 147. | Greenwood MJ, McIntosh AR                                                                                 | 2010 | Low river flow alters the biomass and population structure of a riparian predatory invertebrate                                                                     | Freshwater Biology                                     |
| 148. | Hadley KR, Douglas MS, McGhee R, Blais JM, Smol JP                                                        | 2010 | Ecological influences of Thule Inuit whalers on high Arctic pond ecosystems: a comparative paleolimnological study from Bathurst Island (Nunavut, Canada).          | Journal of Paleolimnology                              |
| 149. | Hall CM                                                                                                   | 2010 | An Island Biogeographical Approach to Island Tourism and Biodiversity: An Exploratory Study of the Caribbean and Pacific Islands                                    | Asia Pacific Journal Of Tourism Research               |
| 150. | Jenkins AP, Jupiter SD, Qauqau I, Atherton J.                                                             | 2010 | The importance of ecosystem-based management for conserving aquatic migratory pathways on tropical high islands: a case study from Fiji                             | Aquatic Conservation: Marine and Freshwater Ecosystems |
| 151. | Jozi SA, Rezaian, S.                                                                                      | 2010 | Presentation of strategic management plan in ecotourism development through SWOT: Case study of Qeshm Island                                                        | Journal of Food Agriculture & Environment              |

|      |                                                                                                                           |      |                                                                                                                                                                 |                                                                  |
|------|---------------------------------------------------------------------------------------------------------------------------|------|-----------------------------------------------------------------------------------------------------------------------------------------------------------------|------------------------------------------------------------------|
| 152. | Kaiser-Bunbury CN,<br>Traveset A, Hansen DM.                                                                              | 2010 | Conservation and restoration of plant–animal mutualisms on oceanic islands                                                                                      | Perspectives in plant ecology, evolution and systematics         |
| 153. | Magbanua FS,<br>Townsend CR,<br>Blackwell GL,<br>Phillips N, Matthaei CD                                                  | 2010 | Responses of stream macroinvertebrates and ecosystem function to conventional, integrated and organic farming                                                   | Journal of Applied Ecology                                       |
| 154. | Nigel R,<br>Rughooputh SD                                                                                                 | 2010 | Soil erosion risk mapping with new datasets: An improved identification and prioritisation of high erosion risk areas                                           | Catena                                                           |
| 155. | Okochi I, Yoshimura M, Abe T, Suzuki H, Yoshimura M, Ura M.                                                               | 2010 | High population densities of an exotic lizard, <i>Anolis carolinensis</i> and its possible role as a pollinator in the Ogasawara Islands.                       | Bulletin Forestry and Forest Products Research Institute Ibaraki |
| 156. | Orrù F, Deiana AM, Cau A.                                                                                                 | 2010 | Introduction and distribution of alien freshwater fishes on the island of Sardinia (Italy): an assessment on the basis of existing data sources                 | Journal of Applied Ichthyology                                   |
| 157. | Ramos Scharron CE                                                                                                         | 2010 | Sediment production from unpaved roads in a sub-tropical dry setting - Southwestern Puerto Rico                                                                 | Catena                                                           |
| 158. | Samways MJ,<br>Hitchins PM,<br>Bourquin O,<br>Henwood J.                                                                  | 2010 | Restoration of a tropical island: Cousine Island, Seychelles                                                                                                    | Biodiversity and Conservation                                    |
| 159. | Skov T, Buchaca T, Amsinck SL, Landkildehus F, Odgaard BV, Azevedo J, Gonçalves V, Raposeiro PM, Andersen TJ, Jeppesen E. | 2010 | Using invertebrate remains and pigments in the sediment to infer changes in trophic structure after fish introduction in Lake Fogo: a crater lake in the Azores | Hydrobiologia                                                    |
| 160. | Strong P, Morris SR                                                                                                       | 2010 | Grey seal ( <i>Halichoerus grypus</i> ) disturbance, ecotourism and the Pembrokeshire Marine Code around Ramsey Island.                                         | Journal of Ecotourism                                            |
| 161. | Wiegner TN, Tubal RL                                                                                                      | 2010 | Comparison of Dissolved Organic Carbon Bioavailability from Native and Invasive Vegetation along a Hawaiian River                                               | Pacific Science                                                  |
| 162. | Wollenberg KC, Jenkins RK, Randrianavelona R, Ralisata M, Rampilamanana R, Ramanandraibe A,                               | 2010 | Raising Awareness of Amphibian Chytridiomycosis will not Alienate Ecotourists Visiting Madagascar                                                               | Ecohealth                                                        |

|      |                                                                                            |      |                                                                                                                                                                                                                                                   |                                                          |
|------|--------------------------------------------------------------------------------------------|------|---------------------------------------------------------------------------------------------------------------------------------------------------------------------------------------------------------------------------------------------------|----------------------------------------------------------|
|      | Ravoahangimalala OR, Vences M.                                                             |      |                                                                                                                                                                                                                                                   |                                                          |
| 163. | Auken E, Violette S, d'Ozouville N, Deffontaines B, Sørensen KI, Viezzoli A, De Marsily G. | 2009 | An integrated study of the hydrogeology of volcanic islands using helicopter borne transient electromagnetic: Application in the Galapagos Archipelago                                                                                            | Workshop on Hydrogeophysics                              |
| 164. | Benstead JP, March JG, Pringle CM, Ewel KC, Short JW                                       | 2009 | Biodiversity and ecosystem function in species-poor communities: community structure and leaf litter breakdown in a Pacific island stream                                                                                                         | Journal of the North American Benthological Society      |
| 165. | Capps KA, Turner CB, Booth MT, Lombardozzi DL, McArt SH, Chai D, Hairston Jr NG.           | 2009 | Behavioral Responses of the Endemic Shrimp <i>Halocaridina rubra</i> (Malacostraca: Atyidae) to an Introduced Fish, <i>Gambusia affinis</i> (Actinopterygii: Poeciliidae) and Implications for the Trophic Structure of Hawaiian Anchialine Ponds | Pacific Science                                          |
| 166. | Crisman TL, Takavakoglou V, Alexadridis T, Zalidis G.                                      | 2009 | Rehabilitation of abandoned saltworks to maximise conservation, ecotourism and water treatment potential                                                                                                                                          | Global Nest Journal                                      |
| 167. | Cunningham P                                                                               | 2009 | Exploring the cultural landscape of the Obeikei in Ogasawara, Japan                                                                                                                                                                               | Journal of Tourism and Cultural Change                   |
| 168. | Gathorne-Hardy FJ, Erlendsson E, Langdon PG, Edwards KJ.                                   | 2009 | Lake sediment evidence for late Holocene climate change and landscape erosion in western Iceland                                                                                                                                                  | Journal of Paleolimnology                                |
| 169. | Holcomb K, Young JK, Gerber LR                                                             | 2009 | The influence of human disturbance on California sea lions during the breeding season                                                                                                                                                             | Animal Conservation                                      |
| 170. | Kaiser-Bunbury CN, Memmott J, Müller CB.                                                   | 2009 | Community structure of pollination webs of Mauritian heathland habitats                                                                                                                                                                           | Perspectives in Plant Ecology, Evolution and Systematics |
| 171. | Lorent H, Sonnenschein R, Tsiourlis GM, Hostert P, Lambin E.                               | 2009 | Livestock Subsidies and Rangeland Degradation in Central Crete                                                                                                                                                                                    | Ecology and Society                                      |
| 172. | Mandal D, Tripathi KP.                                                                     | 2009 | Soil erosion limits for Lakshadweep Archipelago                                                                                                                                                                                                   | Current Science                                          |
| 173. | McKee KL, Vervaeke WC                                                                      | 2009 | Impacts of Human Disturbance on Soil Erosion Potential and Habitat Stability of Mangrove-Dominated Islands in the Pelican Cays and Twin Cays Ranges, Belize                                                                                       | Smithsonian Contributions to the Marine Sciences         |

|      |                                                                                           |      |                                                                                                                                                                           |                                          |
|------|-------------------------------------------------------------------------------------------|------|---------------------------------------------------------------------------------------------------------------------------------------------------------------------------|------------------------------------------|
| 174. | Nash S                                                                                    | 2009 | Ecotourism and Other Invasions                                                                                                                                            | Bioscience                               |
| 175. | Nogueira-Filho SL,<br>Nogueira SS,<br>Fragoso JM                                          | 2009 | Ecological impacts of feral pigs in the Hawaiian Islands                                                                                                                  | Biodiversity and Conservation            |
| 176. | Padrón B, Traveset A, Biedenweg T, Díaz D, Nogales M, Olesen JM.                          | 2009 | Impact of alien plant invaders on pollination networks in two archipelagos                                                                                                | Plos One                                 |
| 177. | Raposeiro PM, Costa AC                                                                    | 2009 | Benthic macroinvertebrate based indices for assessing the ecological status of freshwaters on oceanic islands                                                             | Arquipelago: Life and Marine Sciences    |
| 178. | Ross MS, O'Brien JJ, Ford RG, Zhang K, Morkill A                                          | 2009 | Disturbance and the rising tide: the challenge of biodiversity management on low-island ecosystems                                                                        | Frontiers in Ecology and the Environment |
| 179. | Silva IR, Rossi JC, Nascimento HM, Siqueira TG.                                           | 2009 | Geoenvironmental Characterization and Urbanization of the Beaches on the Islands of Tinhare and Boipeba, South Coast of the State of Bahia, Brazil                        | Journal of Coastal Research              |
| 180. | Skewgar E, Simeone A, Boersma PD.                                                         | 2009 | Marine Reserve in Chile would benefit penguins and ecotourism                                                                                                             | Ocean & Coastal Management               |
| 181. | Traveset A, Nogales M, Alcover JA, Delgado JD, López-Darias M, Godoy D, Igual JM, Bover P | 2009 | A review on the effects of alien rodents in the Balearic (Western Mediterranean Sea) and Canary Islands (Eastern Atlantic Ocean)                                          | Biological Invasions                     |
| 182. | Trejos B, Chiang LH                                                                       | 2009 | Local economic linkages to community-based tourism in rural Costa Rica                                                                                                    | Singapore Journal of Tropical Geography  |
| 183. | Uyarra MC, Watkinson AR, Cote IM                                                          | 2009 | Managing dive tourism for the sustainable use of coral reefs: validating diver perceptions of attractive site features                                                    | Environmental Management                 |
| 184. | Veríssimo D, Fraser I, Groombridge J, Bristol R, MacMillan DC                             | 2009 | Birds as tourism flagship species: a case study of tropical islands                                                                                                       | Animal Conservation                      |
| 185. | Williams R, Bain DE, Smith JC, Lusseau D                                                  | 2009 | Effects of vessels on behaviour patterns of individual southern resident killer whales <i>Orcinus orca</i>                                                                | Endangered Species Research              |
| 186. | Abe H, Hasegawa M                                                                         | 2008 | Impact of volcanic activity on a plant-pollinator module in an island ecosystem: the example of the association of <i>Camellia japonica</i> and <i>Zosterops japonica</i> | Ecological Research                      |



|      |                                                                           |      |                                                                                                                                                                  |                                              |
|------|---------------------------------------------------------------------------|------|------------------------------------------------------------------------------------------------------------------------------------------------------------------|----------------------------------------------|
| 187. | Abe T, Makino SI, Okochi I.                                               | 2008 | Why have endemic pollinators declined on the Ogasawara Islands?                                                                                                  | Biodiversity and Conservation                |
| 188. | Chown SL, Lee JE, Shaw JD                                                 | 2008 | Conservation of Southern Ocean Islands: Invertebrates as exemplars                                                                                               | Journal of Insect Conservation               |
| 189. | Dodd MB, Thorrold BS, Quinn JM, Parminter TG, Wedderburn ME               | 2008 | Improving the economic and environmental performance of a New Zealand hill country farm catchment: 1. Goal development and assessment of current performance     | New Zealand Journal of Agricultural Research |
| 190. | Gilman EL, Ellison J, Duke NC, Field C                                    | 2008 | Threats to mangroves from climate change and adaptation options: A review                                                                                        | Aquatic Botany                               |
| 191. | González JA, Montes C, Rodríguez J, Tapia W.                              | 2008 | Rethinking the Galapagos Islands as a Complex Social-Ecological System: Implications for Conservation and Management                                             | Ecology and Society                          |
| 192. | Goreau TJ, Fisher T, Perez F, Lockhart K, Hibbert M, Lewin A              | 2008 | Turks and Caicos Islands 2006 coral reef assessment: Large-scale environmental and ecological interactions and their management implications                     | Revista De Biología Tropical                 |
| 193. | Ishii HS, Kadoya T, Kikuchi R, Suda SI, Washitani I.                      | 2008 | Habitat and flower resource partitioning by an exotic and three native bumble bees in central Hokkaido, Japan                                                    | Biological Conservation                      |
| 194. | Lambdon PW, Lloret F, Hulme PE.                                           | 2008 | Do alien plants on Mediterranean islands tend to invade different niches from native species?                                                                    | Biological Invasions                         |
| 195. | Mann D, Edwards J, Chase J, Beck W, Reanier R, Mass M, Finney B, Loret J  | 2008 | Drought, vegetation change, and human history on Rapa Nui (Isla de Pascua, Easter Island)                                                                        | Quaternary Research                          |
| 196. | McClung MR, Seddon PJ, Massaro M, Setiawan AN.                            | 2008 | Nature-based tourism impacts on yellow-eyed penguins <i>Megadyptes antipodes</i> : does unregulated visitor access affect fledging weight and juvenile survival? | Biological Conservation                      |
| 197. | Powell RB, Ham SH                                                         | 2008 | Can ecotourism interpretation really lead to pro-conservation knowledge, attitudes and behaviour? Evidence from the Galapagos islands                            | Journal of Sustainable Tourism               |
| 198. | Pries AJ, Miller DL, Branch LC.                                           | 2008 | Identification of structural and spatial features that influence storm-related dune erosion along a barrier-island ecosystem in the Gulf of Mexico               | Journal of Coastal Research                  |
| 199. | Sánchez-Fernández D, Bilton DT, Abellán P, Ribera I, Velasco J, Millán A. | 2008 | Are the endemic water beetles of the Iberian Peninsula and the Balearic Islands effectively protected?                                                           | Biological Conservation                      |
| 200. | Svensson P, Rodwell LD, Attrill MJ                                        | 2008 | Hotel managed marine reserves: A willingness to pay survey                                                                                                       | Ocean & Coastal Management                   |

|      |                                                                                     |      |                                                                                                                                                          |                                                 |
|------|-------------------------------------------------------------------------------------|------|----------------------------------------------------------------------------------------------------------------------------------------------------------|-------------------------------------------------|
| 201. | Walter HS, Levin GA.                                                                | 2008 | Feral sheep on Socorro Island: facilitators of alien plant colonization and ecosystem decay                                                              | Diversity & Distributions                       |
| 202. | Burns CW, Galbraith LM                                                              | 2007 | Relating planktonic microbial food web structure in lentic freshwater ecosystems to water quality and land use                                           | Journal of Plankton Research                    |
| 203. | Dehghani M, Farshchi P, Danekar A, Karami M, Aleshikh AA.                           | 2007 | Recreation Value of Hara Biosphere Reserve using Willingness-to-pay method                                                                               | International journal of environmental research |
| 204. | Keatley BE, Douglas MS, Smol JP                                                     | 2007 | Limnological characteristics of a high arctic oasis and comparisons across northern Ellesmerelands                                                       | Arctic                                          |
| 205. | Laroche R, Kock AA, Dill LM, Oosthuizen W.                                          | 2007 | Effects of provisioning ecotourism activity on the behaviour of white sharks <i>Carcharodon carcharias</i>                                               | Marine Ecology Progress Series                  |
| 206. | Lawson IT, Edwards KJ, Church MJ, Newton AJ, Cook GT, Gathorne-Hardy FJ, Dugmore AJ | 2007 | Human impact on an island ecosystem: pollen data from Sandoy, Faroe Islands                                                                              | Journal of Biogeography                         |
| 207. | McCoy MD, Hartshorn AS                                                              | 2007 | Wind erosion and intensive prehistoric agriculture: A case study from the Kalaupapa field system, Moloka'i Island, Hawai'i                               | Geoarchaeology                                  |
| 208. | Ramos-Scharron CE, MacDonald LH                                                     | 2007 | Runoff and suspended sediment yields from an unpaved road segment, St John, US Virgin Islands                                                            | Hydrological Processes                          |
| 209. | Rowat D, Engelhardt U                                                               | 2007 | Seychelles: A case study of community involvement in the development of whale shark ecotourism and its socio-economic impact                             | Fisheries research                              |
| 210. | Teh L, Cabanban AS                                                                  | 2007 | Planning for sustainable tourism in southern Pulau Banggi: An assessment of biophysical conditions and their implications for future tourism development | Journal of Environmental Management             |
| 211. | Gangoso L, Donázar JA, Scholz S, Palacios CJ, Hiraldo F                             | 2006 | Contradiction in conservation of island ecosystems: Plants, introduced herbivores and avian scavengers in the Canary Islands                             | Biodiversity and Conservation                   |
| 212. | Karagiannis S                                                                       | 2006 | A Tourism policy proposal for sustainable ecotourism development: the case of Dirfis Area in Euboea, Greece.                                             | Journal of Environmental Protection and Ecology |
| 213. | Potts SG, Petanidou T, Roberts S, O'Toole C, Hulbert A, Willmer P                   | 2006 | Plant-pollinator biodiversity and pollination services in a complex Mediterranean landscape                                                              | Biological Conservation                         |

|      |                                                                                          |      |                                                                                                                                 |                                                |
|------|------------------------------------------------------------------------------------------|------|---------------------------------------------------------------------------------------------------------------------------------|------------------------------------------------|
| 214. | Serio-Silva JC                                                                           | 2006 | Las Islas de los changos (the Monkey Islands): The economic impact of ecotourism in the region of Los Tuxtlas, Veracruz, Mexico | American Journal of Primatology                |
| 215. | Tran KC                                                                                  | 2006 | Public perception of development issues: Public awareness can contribute to sustainable development of a small island           | Ocean & Coastal Management                     |
| 216. | Vila M, Bartomeus I, Gimeno I, Traveset A, Moragues E                                    | 2006 | Demography of the invasive geophyte <i>Oxalis pes-caprae</i> across a Mediterranean Island                                      | Annals of Botany                               |
| 217. | Chabanet P, Adjeroud M, Andréfouët S, Bozec YM, Ferraris J, Garcia-Charton JA, Schrimm M | 2005 | Human-induced physical disturbances and their indicators on coral reef habitats: A multi-scale approach                         | Aquatic Living Resources                       |
| 218. | Chartzoulakis K, Psarras G.                                                              | 2005 | Global change effects on crop photosynthesis and production in Mediterranean: the case of Crete, Greece                         | Agriculture, Ecosystems and Environment        |
| 219. | Hughes SJ, Malmqvist B.                                                                  | 2005 | Atlantic Island freshwater ecosystems: challenges and considerations following the EU Water Framework Directive                 | Hydrobiologia                                  |
| 220. | Krüger O.                                                                                | 2005 | The role of ecotourism in conservation: panacea or Pandora's box?                                                               | Biodiversity & Conservation                    |
| 221. | Lim C, McAleer M.                                                                        | 2005 | Ecologically sustainable tourism management                                                                                     | Environmental Modelling & Software             |
| 222. | Mieth A, Bork HR                                                                         | 2005 | History, origin and extent of soil erosion on Easter Island (Rapa Nui)                                                          | Catena                                         |
| 223. | Moreno PS                                                                                | 2005 | Ecotourism along the Meso-American Caribbean Reef: The impacts of foreign investment                                            | Human Ecology                                  |
| 224. | Nelson V                                                                                 | 2005 | Representation and images of people, place and nature in Grenada's tourism                                                      | Geografiska Annaler: Series B, Human Geography |
| 225. | Ramos-Scharrón CE, MacDonald LH                                                          | 2005 | Measurement and prediction of sediment production from unpaved roads, St John, US Virgin Islands                                | Earth Surface Processes and Landforms          |
| 226. | Schumacher JD, Kruse GH                                                                  | 2005 | Toward sustainable ecosystem services from the Aleutian Archipelago                                                             | Fisheries Oceanography                         |
| 227. | St. Louis VL, Sharp MJ, Steffen A, May A, Barker J, Kirk JL,                             | 2005 | Some sources and sinks of monomethyl and inorganic mercury on Ellesmere island in the Canadian high arctic                      | Environmental Science & Technology             |

|      |                                                           |      |                                                                                                                                                                      |                                      |
|------|-----------------------------------------------------------|------|----------------------------------------------------------------------------------------------------------------------------------------------------------------------|--------------------------------------|
|      | Kelly DJ, Arnott SE, Keatley B, Smol JP                   |      |                                                                                                                                                                      |                                      |
| 228. | Wolanski E, Fabricius K, Spagnol S, Brinkman R            | 2005 | Fine sediment budget on an inner-shelf coral-fringed island, Great Barrier Reef of Australia                                                                         | Estuarine, Coastal and Shelf Science |
| 229. | Boothroyd IK, Quinn JM, Langer EL, Costley KJ, Steward G. | 2004 | Riparian buffers mitigate effects of pine plantation logging on New Zealand streams - 1. Riparian vegetation structure, stream geomorphology and periphyton          | Forest Ecology and Management        |
| 230. | De Stoppelaire GH, Gillespie TW, Brock JC, Tobin GA.      | 2004 | Use of remote sensing techniques to determine the effects of grazing on vegetation cover and dune elevation at Assateague Island National Seashore: Impact of horses | Environmental Management             |
| 231. | Kato M, Kawakita A                                        | 2004 | Plant-pollinator interactions in New Caledonia influenced by introduced honey bees                                                                                   | American Journal of Botany           |
| 232. | Riget F, Dietz R, Vorkamp K, Johansen P, Muir D.          | 2004 | Levels and spatial and temporal trends of contaminants in Greenland biota: an updated review                                                                         | Science of the Total Environment     |
| 233. | Zhao B, Kreuter U, Li B, Ma Z, Chen J, Nakagoshi N        | 2004 | An ecosystem service value assessment of land-use change on Chongming Island, China                                                                                  | Land Use Policy                      |
| 234. | Abel T                                                    | 2003 | Understanding complex human ecosystems: The case of ecotourism on Bonaire                                                                                            | Conservation Ecology                 |
| 235. | Anderson SH                                               | 2003 | The relative importance of birds and insects as pollinators of the New Zealand flora                                                                                 | New Zealand Journal of Ecology       |
| 236. | Benstead JP, Douglas MM, Pringle CM.                      | 2003 | Relationships of stream invertebrate communities to deforestation in eastern Madagascar                                                                              | Ecological Applications              |
| 237. | Guzmán HM, Guevara C, Castillo A                          | 2003 | Natural disturbances and mining of Panamanian coral reefs by indigenous people                                                                                       | Conservation Biology                 |
| 238. | Prokopiou DG, Tselentis BS                                | 2003 | Environmental impacts of tourist development in Rhodes                                                                                                               | Sustainable planning and development |
| 239. | Stolen ED                                                 | 2003 | The effects of vehicle passage on foraging behavior of wading birds                                                                                                  | Waterbirds                           |
| 240. | Tashiro Y, Takemura A, Fujii H, Takahira K, Nakanishi Y.  | 2003 | Livestock wastes as a source of estrogens and their effects on wildlife of Manko tidal flat, Okinawa                                                                 | Marine Pollution Bulletin            |
| 241. | Woodcock D                                                | 2003 | To restore the watersheds: Early twentieth-century tree planting in Hawai'i                                                                                          | Annals of the Association of         |

|      |                                                |      |                                                                                                                                                                                           |                                                       |
|------|------------------------------------------------|------|-------------------------------------------------------------------------------------------------------------------------------------------------------------------------------------------|-------------------------------------------------------|
|      |                                                |      |                                                                                                                                                                                           | American Geographers                                  |
| 242. | Bingham M                                      | 2002 | The decline of Falkland Islands penguins in the presence of a commercial fishing industry                                                                                                 | Revista Chilena de Historia Natural                   |
| 243. | Caruso BS                                      | 2002 | Temporal and spatial patterns of extreme low flows and effects on stream ecosystems in Otago, New Zealand                                                                                 | Journal of Hydrology                                  |
| 244. | Corbett DR, Dillon K, Burnett W, Schaefer G    | 2002 | The spatial variability of nitrogen and phosphorus concentration in a sand aquifer influenced by onsite sewage treatment and disposal systems: a case study on St. George Island, Florida | Environmental Pollution                               |
| 245. | Gössling S, Hansson CB, Hörstmeier O, Saggel S | 2002 | Ecological footprint analysis as a tool to assess tourism sustainability                                                                                                                  | Ecological Economics                                  |
| 246. | Hansen DM, Olesen JM, Jones CG                 | 2002 | Trees, birds and bees in Mauritius: exploitative competition between introduced honey bees and endemic nectarivorous birds?                                                               | Journal of Biogeography                               |
| 247. | Hercok M                                       | 2002 | Integrating local environmental management and federal/state interests through governance: the case of the Garden Island Environmental Advisory Committee                                 | Environmental Management                              |
| 248. | Domroes M                                      | 2001 | Conceptualising State-Controlled Resort Islands for an Environment-Friendly Development of Tourism: The Maldivian Experience                                                              | Singapore journal of tropical geography               |
| 249. | Roubik DW, Wolda H.                            | 2001 | Do competing honey bees matter? Dynamics and abundance of native bees before and after honey bee invasion                                                                                 | Population Ecology                                    |
| 250. | Arhonditsis G, Giourga C, Loumou A.            | 2000 | Ecological patterns and comparative nutrient dynamics of natural and agricultural Mediterranean-type ecosystems                                                                           | Environmental Management                              |
| 251. | Cooper M                                       | 2000 | Backpackers to Fraser Island: Why is ecotourism a neglected aspect of their experience?                                                                                                   | Journal of Quality Assurance in Hospitality & Tourism |
| 252. | Cox PA, Elmqvist T.                            | 2000 | Pollinator Extinction in the Pacific Islands                                                                                                                                              | Conservation Biology                                  |
| 253. | Nunn PD                                        | 2000 | Coastal changes over the past 200 years around Ovalau and Moturiki Islands, Fiji: implications for coastal zone management                                                                | Australian Geographer                                 |
| 254. | Vacca A                                        | 2000 | Effect of land use on forest floor and soil of a <i>Quercus suber</i> L-forest in Gallura (Sardinia, Italy)                                                                               | Land Degradation                                      |

|      |                                                                                   |      |                                                                                                                                               |                                                 |
|------|-----------------------------------------------------------------------------------|------|-----------------------------------------------------------------------------------------------------------------------------------------------|-------------------------------------------------|
|      |                                                                                   |      |                                                                                                                                               | and Development                                 |
| 255. | Gigord L, Picot F, Shykoff JA                                                     | 1999 | Effects of habitat fragmentation on <i>Dombeya acutangula</i> (Sterculiaceae), a native tree on La Reunion (Indian Ocean)                     | Biological Conservation                         |
| 256. | Tershy BR, Bourillon L, Metzler L, Barnes J                                       | 1999 | A survey of ecotourism on islands in northwestern Mexico                                                                                      | Environmental Conservation                      |
| 257. | Duwig C, Becquer T, Clothier BE, Vauclin M                                        | 1998 | Nitrate leaching through oxisols of the Loyalty Islands (New Caledonia) under intensified agricultural practices                              | Geoderma                                        |
| 258. | Rawlins BG, Ferguson AJ, Chilton PJ, Arthurton RS, Rees JG, Baldock JW            | 1998 | Review of agricultural pollution in the Caribbean with particular emphasis on small island developing states                                  | Marine Pollution Bulletin                       |
| 259. | Smirnov VV, Tretyakov K                                                           | 1998 | Changes in aquatic plant communities on the island of Valaam due to invasion by the muskrat <i>Ondatra zibethicus</i> L. (Rodentia, Mammalia) | Biodiversity and Conservation                   |
| 260. | Macdonald LH, Anderson DM, Dietrich WE                                            | 1997 | Paradise threatened: Land use and erosion on St. John, US Virgin Islands                                                                      | Environmental Management                        |
| 261. | Tershy BR, Breese D, Croll DA.                                                    | 1997 | Human perturbations and conservation strategies for San Pedro Martir Island, Islas del Golfo de California Reserve, Mexico                    | Environmental Conservation                      |
| 262. | Christian C, Potts T, Burnett G, Lacher Jr T                                      | 1996 | Parrot conservation and ecotourism in the Windward islands                                                                                    | Journal of Biogeography                         |
| 263. | Kirch PV                                                                          | 1996 | Late holocene human-induced modifications to a central Polynesian island ecosystem                                                            | Proceedings of the National Academy of Sciences |
| 264. | Rodriguez-Estrella R, de la Luz JL, Breceda A, Castellanos A, Cancino J, Llinas J | 1996 | Status, density and habitat relationships of the endemic terrestrial birds of Socorro Island, Revillagigedo Islands, Mexico                   | Biological Conservation                         |
| 265. | Ayala H                                                                           | 1995 | From quality product to ecoproduct: will Fiji set a precedent?                                                                                | Tourism Management                              |
| 266. | Desbonnet A, Lee V, Pogue P, Reis D, Boyd J, Willis J, Imperial M.                | 1995 | Development of coastal vegetated buffer programs.                                                                                             | Coastal Management                              |

|      |                                                              |      |                                                                                                   |                             |
|------|--------------------------------------------------------------|------|---------------------------------------------------------------------------------------------------|-----------------------------|
| 267. | Van Balen S,<br>Prawiradilaga DM,<br>Indrawan M.             | 1995 | The distribution and status of green peafowl <i>Pavo muticus</i> in Java                          | Biological Conservation     |
| 268. | Weaver DB                                                    | 1995 | Alternative tourism in Montserrat                                                                 | Tourism Management          |
| 269. | Zurick DN                                                    | 1995 | Preserving paradise                                                                               | Geographical Review         |
| 270. | Sanson L                                                     | 1994 | An ecotourism case study in Sub-Antarctic Islands                                                 | Annals of Tourism Research  |
| 271. | Kirch PV, Flenley JR,<br>Steadman DW,<br>Lamont F, Dawson S. | 1992 | Ancient Environmental Degradation                                                                 | Research & Exploration      |
| 272. | Cox PA, Elmqvist T,<br>Pierson ED, Rainey WE                 | 1991 | Flying foxes as strong interactors in South Pacific island ecosystems: a conservation hypothesis  | Conservation Biology        |
| 273. | Ellison JC, Stoddart DR                                      | 1991 | Mangrove Ecosystem. Collapse During Predicted Sea-Level Rise: Holocene Analogues and Implications | Journal of Coastal Research |

Appendix B – Global distribution of the studies retrieved from this review of literature. The legend provides an indication of the size of the circles for selected reference values, including the minimum and maximum number of studies.

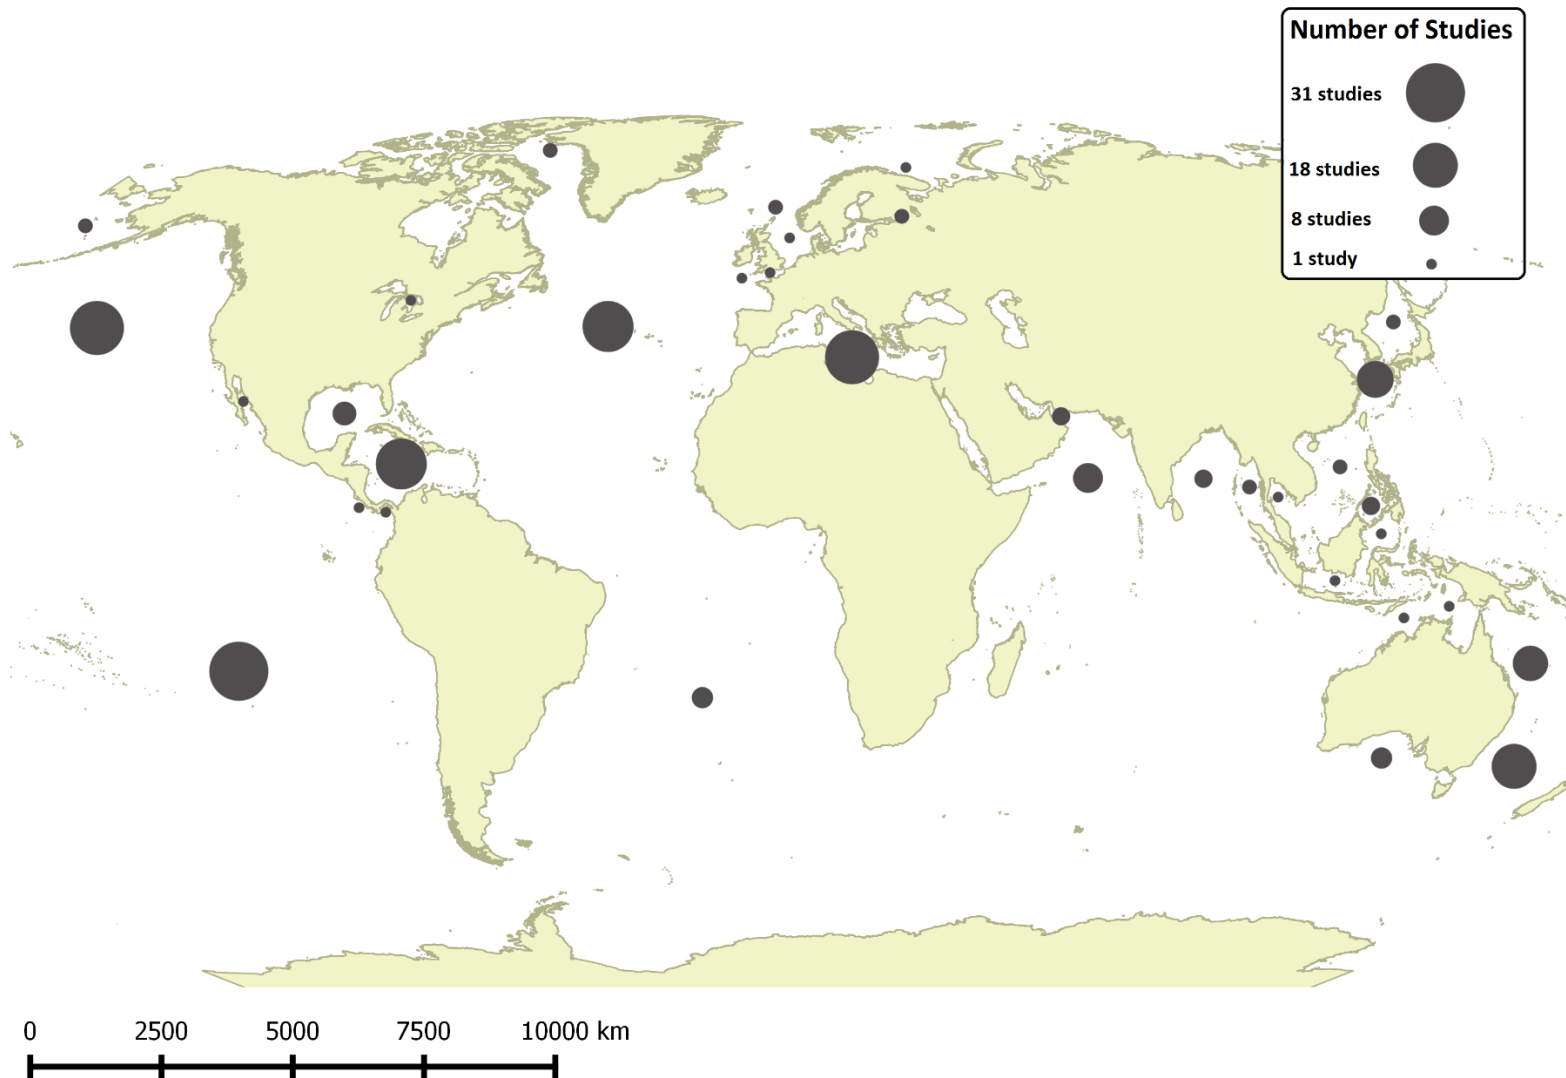



Appendix C – The global distribution of drivers and pressures to island ecosystems and their services. The legend identifies the pressures and threats, and provides an indication of the size of the pie charts for selected reference values, including the minimum and maximum values, and according to the frequency by which the pressures appeared in the literature.

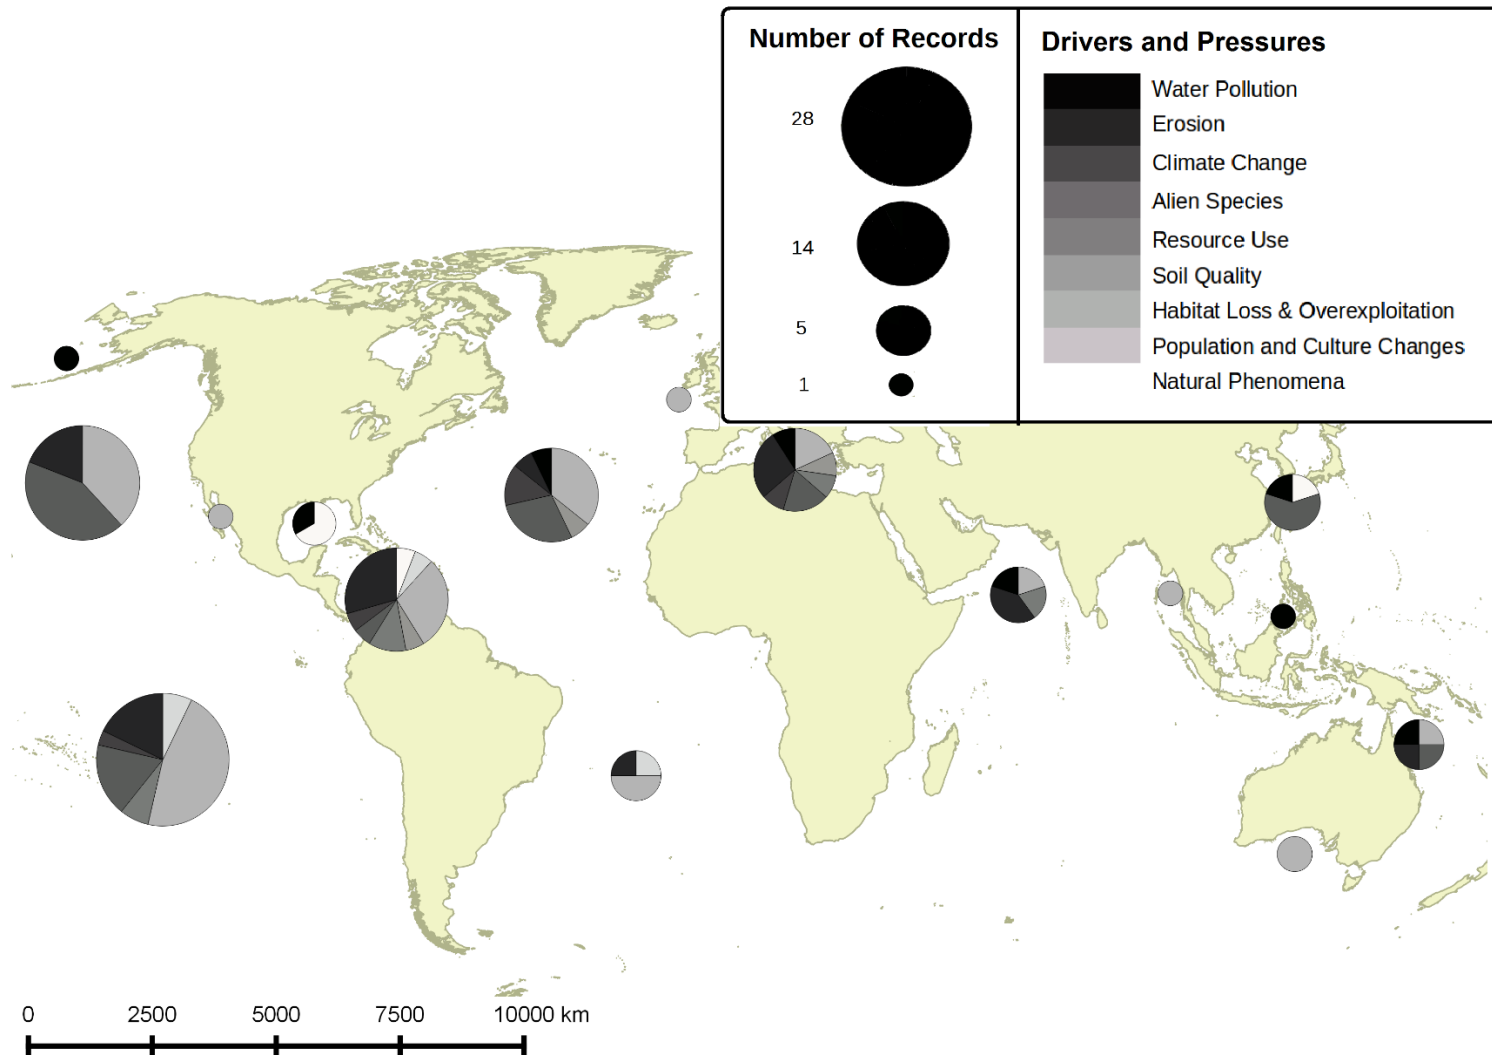

Supplement: Supplementary file 1 [file 12404510]
